# Supplementary material for: A Highly Efficient Heterogeneous Catalyst of Bimetal-Organic Frameworks for the Epoxidation of Olefin with H2O2
Source: MDPI journal article supplement (doi:10.3390/molecules25102389), 2020-05-21
Supplement: s1 [file s1]

## Supporting information

The charge distribution of atoms on styrene has been calculated by the density functional theory (DFT) method at the B3LYP/ (6-311G (d) level using Gaussian 09 program. The calculated results were as follows:

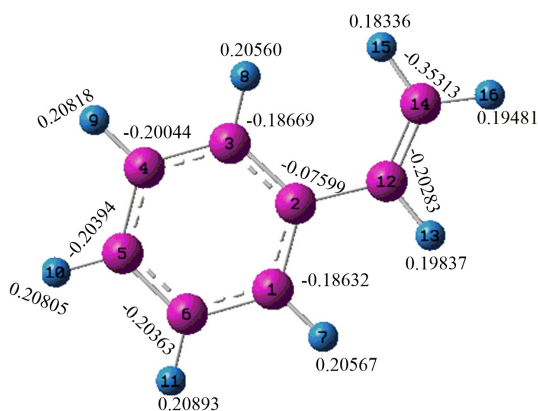

Figure S1 The calculated distribution of NBO charge for styrene

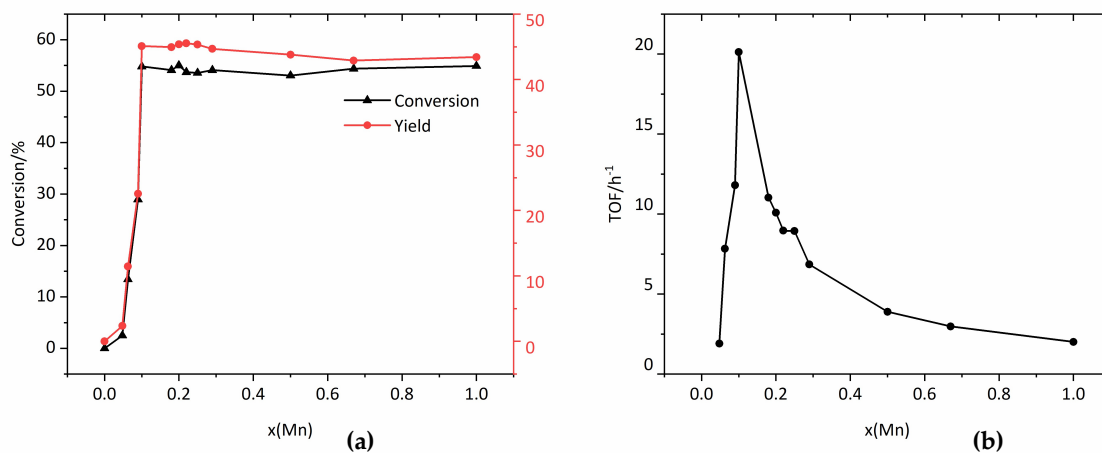

Figure S2. (a) Plots of conversion of styrene and the yield of styrene oxide versus a series of  $\text{Mn}_x\text{Cu}_y\text{-MOFs}$ , 3h.

(b) The TOF per Mn site with different mole ratio of Mn, 3h.
